# Supplementary material for: Soft-template assisted synthesis of hexagonal antimonene and bismuthene in colloidal solutions
Source: Royal Society of Chemistry journal article supplement (doi:10.1039/d0nr05578f), 2020-01-01
Supplement: d0nr05578f1.pdf [file d0nr05578f1.pdf]

**Supporting Information**

**Soft-Template Assisted Synthesis of Hexagonal Antimonene and  
Bismuthene in Colloidal Solutions**

Jing Zhang, Shuai Ye,\* Yuan Sun, Feifan Zhou, Jun Song, and Junle Qu

Center for Biomedical Optics and Photonics (CBOP) & College of Physics and Optoelectronic  
Engineering, Key Laboratory of Optoelectronic Devices and Systems, Shenzhen University,  
Shenzhen 518060, P. R. China

Email: [yes-121@163.com](mailto:yes-121@163.com) or [yes121@szu.edu.cn](mailto:yes121@szu.edu.cn)

## Table of contents

|                                                                                        |     |
|----------------------------------------------------------------------------------------|-----|
| Experimental Section                                                                   | S2  |
| Figure S1. Photograph and XRD pattern of $\text{Sb}_2\text{S}_3$ synthesized by Sb-DDT | S4  |
| Figure S2-1. The TEM images of synthesized antimonene at 250 and 230 °C                | S5  |
| Figure S2-2. AFM image of antimonene nanosheets                                        | S5  |
| Figure S2-3. EDS spectrum of antimonene nanosheets                                     | S6  |
| Figure S2-4. Wide-scan XPS spectrum of antimonene nanosheets                           | S6  |
| Figure S2-5. The absorption spectrum of synthesized antimonene nanosheets              | S7  |
| Figure S3-1. XRD pattern of synthesized antimonene nanosheets after storage            | S8  |
| Figure S3-2. The TEM images of synthesized antimonene nanosheets after storage         | S8  |
| Figure S3-3. XPS spectrum of synthesized antimonene nanosheets after storage           | S9  |
| Figure S3-4. TGA analysis of synthesized antimonene nanosheets                         | S9  |
| Figure S4-1. The TEM images of Sb nanocrystals synthesized with Sb-TOPO                | S10 |
| Figure S4-2. XRD pattern of Sb nanocrystals synthesized with Sb-TOPO                   | S10 |
| Figure S5-1. Small-angle XRD pattern of Sb-HPA and TEM image of products               | S11 |
| Figure S5-2. Small-angle XRD pattern of Sb-DDT precursor                               | S11 |
| Table S1. Calculation of interlayer spacing in lamellar structure and ligand length.   | S12 |
| Figure S6-1. EDS spectrum of bismuthene nanosheets                                     | S13 |
| Figure S6-2. Wide-scan XPS spectra of bismuthene nanosheets                            | S13 |
| Figure S6-3. The absorption spectrum of synthesized bismuthene nanosheets              | S14 |
| Figure S6-4. Stability test of synthesized bismuthene nanosheets                       | S14 |

## EXPERIMENTAL SECTION

**Chemicals.** Antimony trichloride ( $\text{SbCl}_3$ , 99.999%), antimony triacetate ( $\text{Sb}(\text{OAc})_3$ , 99.99%), hexylphosphonic acid (HPA, 95%), trioctylphosphine oxide (TOPO, 99%), 1-dodecanethiol (1-DDT, 99.9%), and oleylamine (OLA, 70%) were purchased from Sigma Aldrich. Bismuth trichloride ( $\text{BiCl}_3$ , 99.99%) and hexadecylphosphonic acid (HDPa, 98%) were purchased from Macklin, dodecylphosphonic acid (DDA, 98%) was purchased from Aladdin. Cyclohexane, ethanol, toluene and chloroform were used as received.

### Synthesis of antimonene and bismuthene nanosheets.

In a typical reaction batch for synthesizing antimonene nanosheets (Figure 1), Sb precursors were prepared first.  $\text{SbCl}_3$  (0.137 g, 0.6 mmol) and HDPa (0.721 g, 2.0 mmol) were loaded into a glass vial at room temperature followed by reacting at 90 °C to get a colorless Sb precursor solution. 4.5 mL OLA was degassed in a 50 mL three-necked flask at room temperature for 30 min. Afterwards, the solution was heated up to 270 °C under nitrogen and Sb precursors solution was swiftly added into the OLA solution with immediately formation of gray suspension. After 1 min of growth, the heating mantle was removed to quench the reaction. The as-synthesized samples were quickly extracted from the reaction flask for further washing when the solution temperature decreased to 120 °C. For the synthesis of bismuthene nanosheets (Figure 4), Bi precursor was prepared through a similar way through reacting between  $\text{BiCl}_3$  (0.190 g, 0.6 mmol) and DDA (0.501 g, 2.0 mmol) at 90 °C.

To wash the samples, we extracted the crude samples and centrifuged at 8000 rpm for 5 s. The supernatant was discarded, and the precipitates were dispersed in toluene followed by sonicating for 5 mins. Afterwards, the solutions were centrifuged at 8500 rpm for 2 min. We repeated this process for five times to get purified samples. Finally, the samples were dispersed in toluene for further characterization.

**Preparation of Sb-HPA, Sb-TOPO and Sb-DDT precursors:** For investigating the lamellar structure of Sb precursors, we prepared Sb-HPA and Sb-TOPO precursors by reacting  $\text{SbCl}_3$  (0.137 g, 0.6 mmol) with HPA (0.332 g, 2.0 mmol) at 80 °C (Figure 3c), and TOPO (0.773 g, 2.0 mmol) at 50 °C (Figure 3e). Moreover, Sb-DDT was also prepared (Figure S5-2) through

mixing  $\text{Sb}(\text{OAc})_3$  (0.137 g, 0.6 mmol) and 1-DDT (0.50 mL, 2.0 mmol) at 50 °C.

#### **Characterization.**

The purified samples were dispersed in toluene and dropped on a carbon coated copper grid for TEM characterization. Transmission electron microscope (TEM) images and Energy-dispersive spectroscopy (EDS) measurements were performed on a transmission electron microscope (JEM-F200, JEOL) with an acceleration voltage of 200 kV. The low-resolution TEM images in supporting information were collected on a HT7700 transmission electron microscope.

UV-visible absorption spectra were collected with 1 nm data collection interval by a SHIMADZU UV-1780 UV-visible spectrophotometer. Powder X-ray diffraction (XRD) patterns were recorded on an X-ray diffractometer (Ultima IV) with a  $\text{Cu K}\alpha$  beam ( $\lambda = 1.5418 \text{ \AA}$ ), the purified samples were dispersed in cyclohexane and deposited on a silicon substrate for XRD test. X-ray photoelectron spectroscopy (XPS) measurements were performed using PHI5000VersaProbell, with the purified antimonene and bismuthine nanosheet samples dropped on silicon wafer. Raman spectra were collected using a Confocal Raman Microscope (Alpha300 R, Germany) equipped with a 785 nm laser for antimonene nanosheets and bulk Sb, and a Confocal Raman Microscope (Horiba LabRAM HR800) equipped with a 532 nm laser for bismuthene nanosheets and bulk Bi.

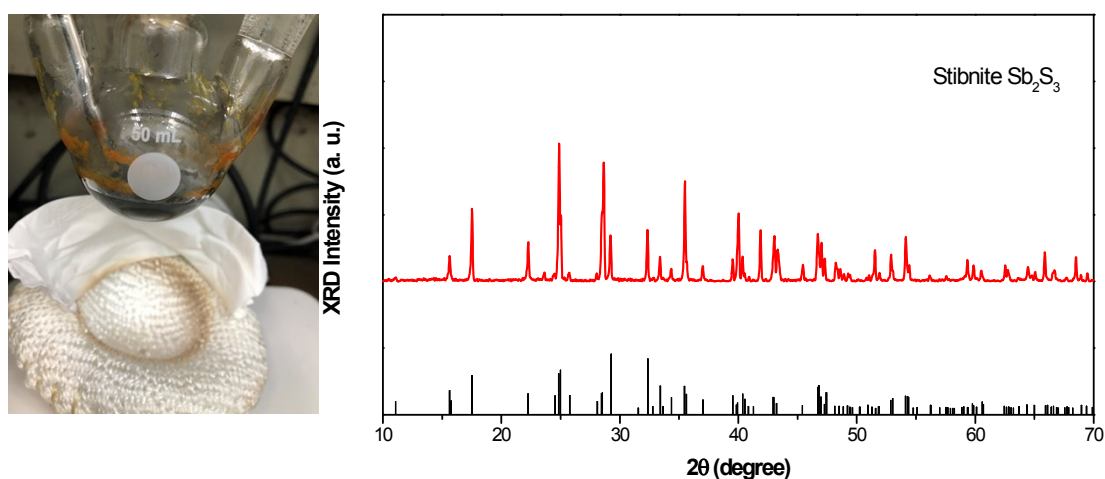

**Figure S1.** The photograph and XRD pattern of  $\text{Sb}_2\text{S}_3$  synthesized by employing Sb-DDT as precursor at 300 °C.

The gray suspension formed accompany with orange precipitates appeared at the inner wall of the flask after Sb-DDT adding. XRD pattern of the obtained products suggests the formation of  $\text{Sb}_2\text{S}_3$ . The formation of  $\text{Sb}_2\text{S}_3$  by-product is ascribed to the low thermal decomposition temperature of 1-DDT ( $\sim 200$  °C),<sup>1,2</sup> which caused sulfurization of the yielded monoelemental Sb.

(1) Y. Zhai, M. Shim, *Chem. Mater.* **2017**, 29, 2390-2397;

(2) M. Kruszynska, H. Borchert, A. Bachmatiuk, M. H. Rummeli, B. Büchner, J. Parisi, J. Kolny-Olesiak, *ACS Nano*, **2012**, 6, 5889-5896.

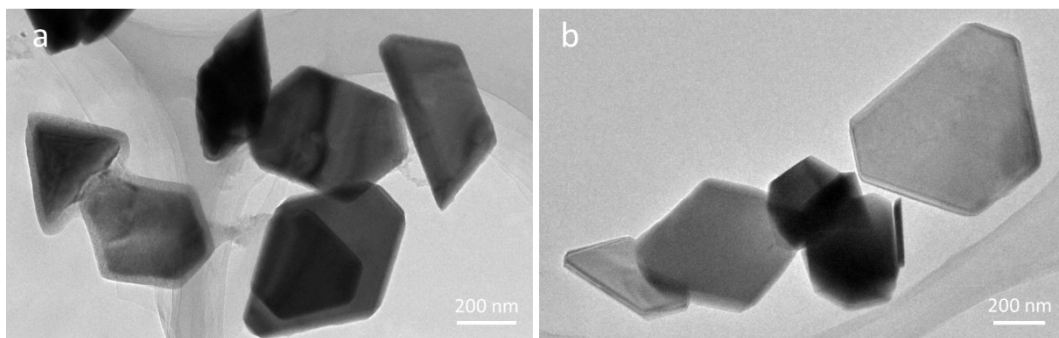

**Figure S2-1.** The TEM images of antimonene nanosheets synthesized at 250 °C for 1 min (a) and 230 °C for 20 min (b).

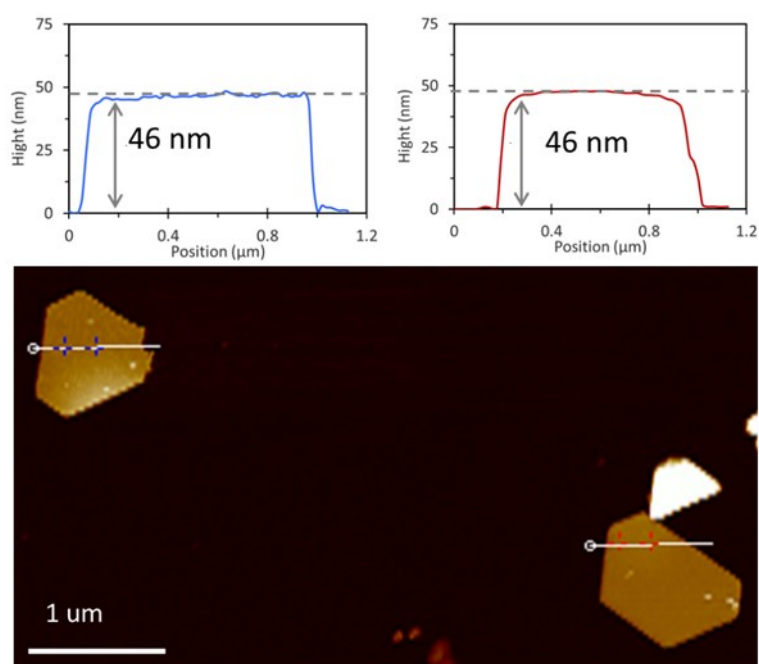

**Figure S2-2.** Typical AFM image and corresponding height profiles of synthesized antimonene nanosheet.

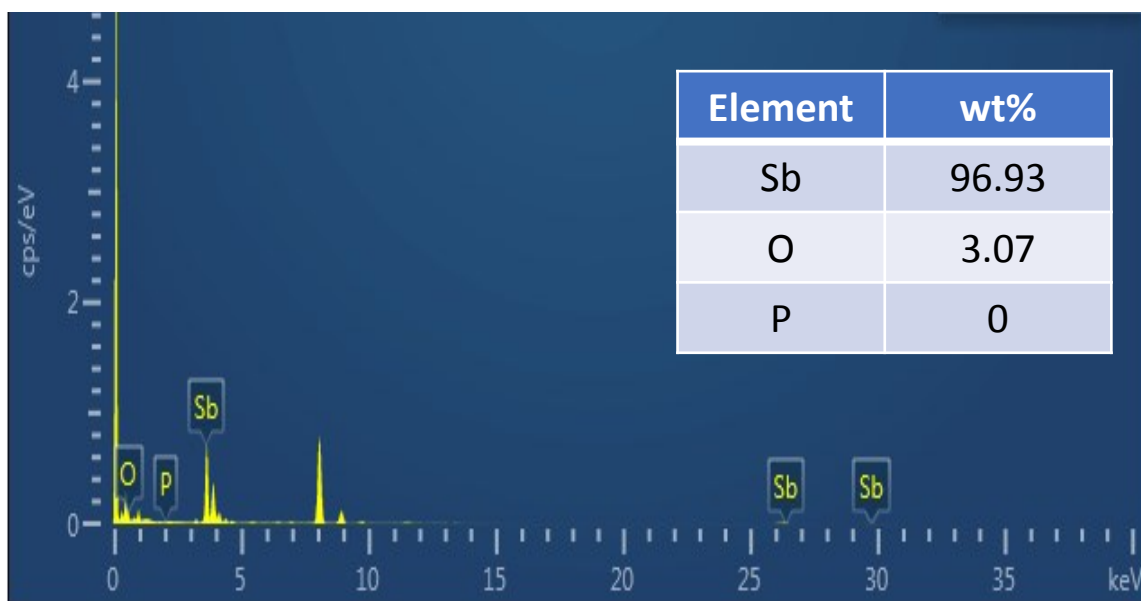

**Figure S2-3.** EDS spectrum of the antimonene nanosheets. Here, the 0 wt% of P atom is attribute to the very trace amount of P atom which is below the detection limit of the machine.

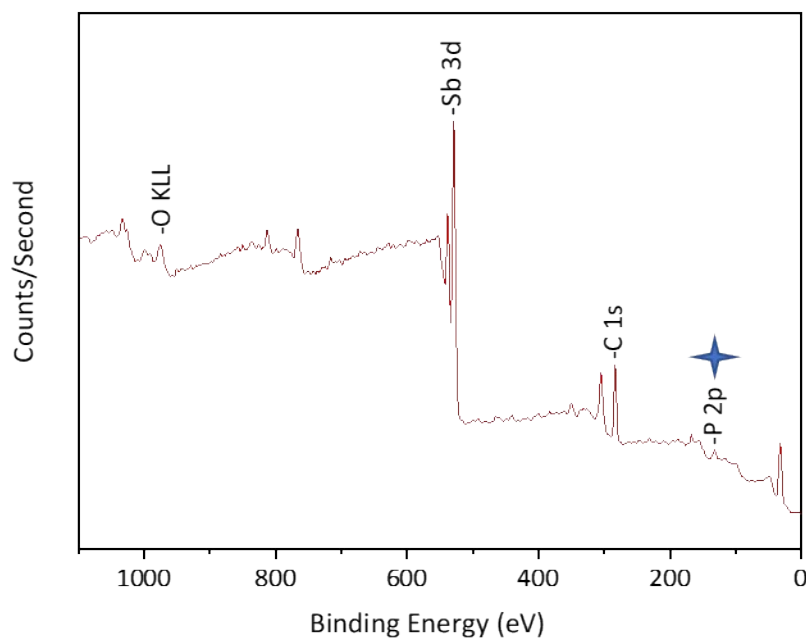

**Figure S2-4.** Wide-scan X-ray photoelectron spectra of the obtained antimonene nanosheets.

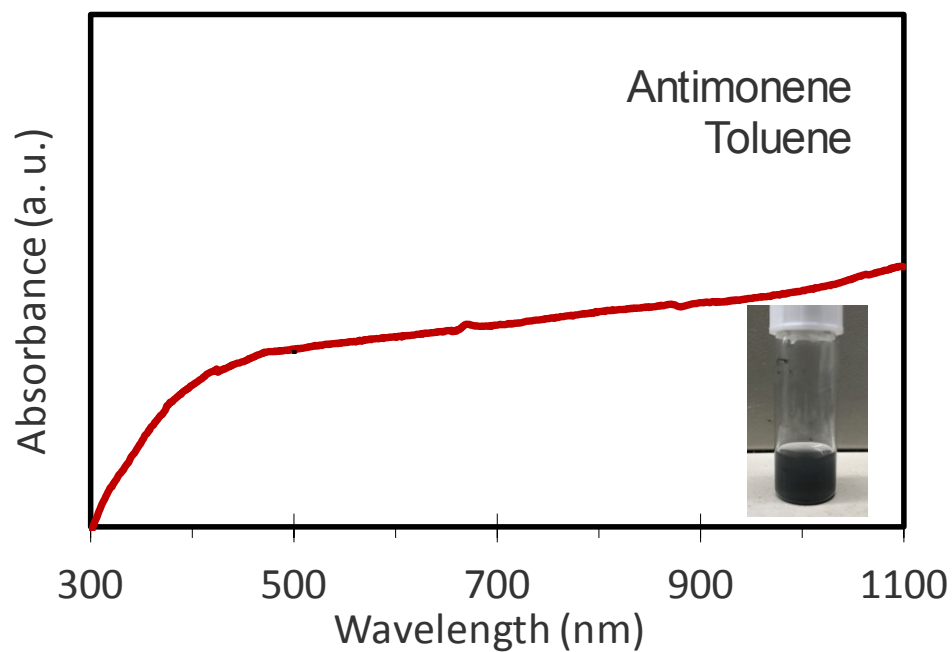

**Figure S2-5.** The absorption spectrum of the as-synthesized antimonene nanosheets, the photograph of antimonene solution dispersed in toluene is shown in the insert.



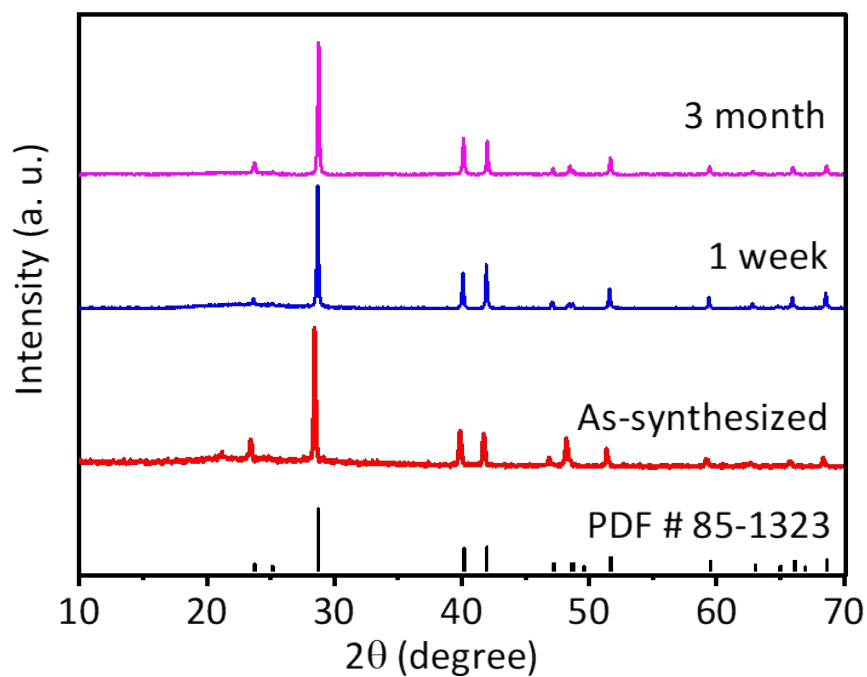

**Figur**

**e S3-1.** The XRD patterns of the as-synthesized antimonene nanosheets and after storage in the air.

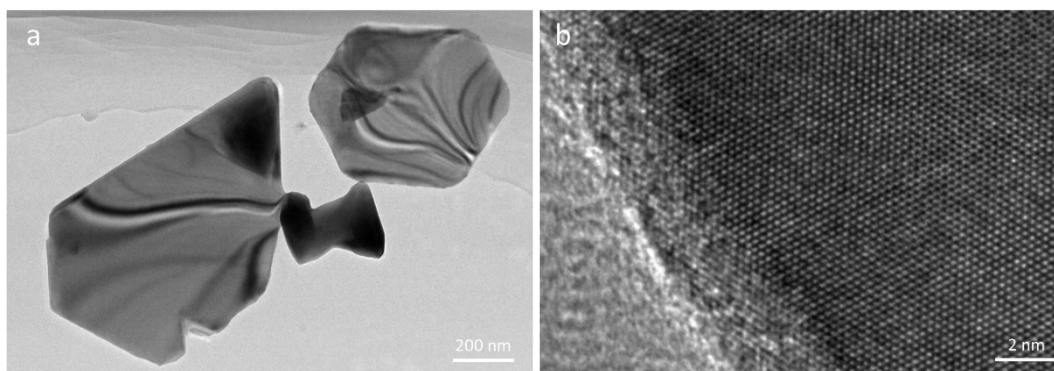

**Figure S3-2.** The TEM (a) and high-resolution TEM (b) images of antimonene nanosheets after storage for one week.

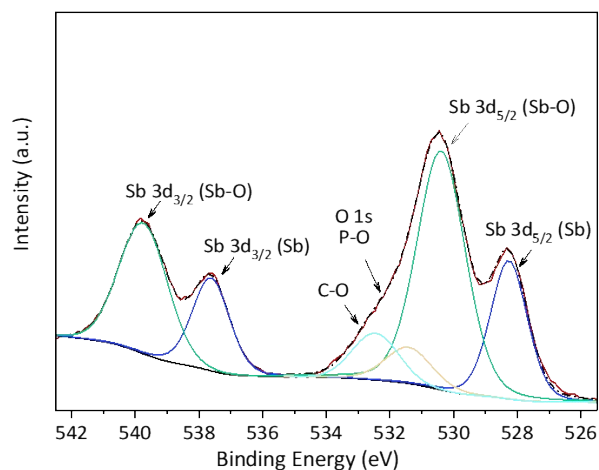

**Figure S3-3.** High-resolution XPS results and peak deconvolution of the as-synthesized antimonene nanosheets after storage for one week.

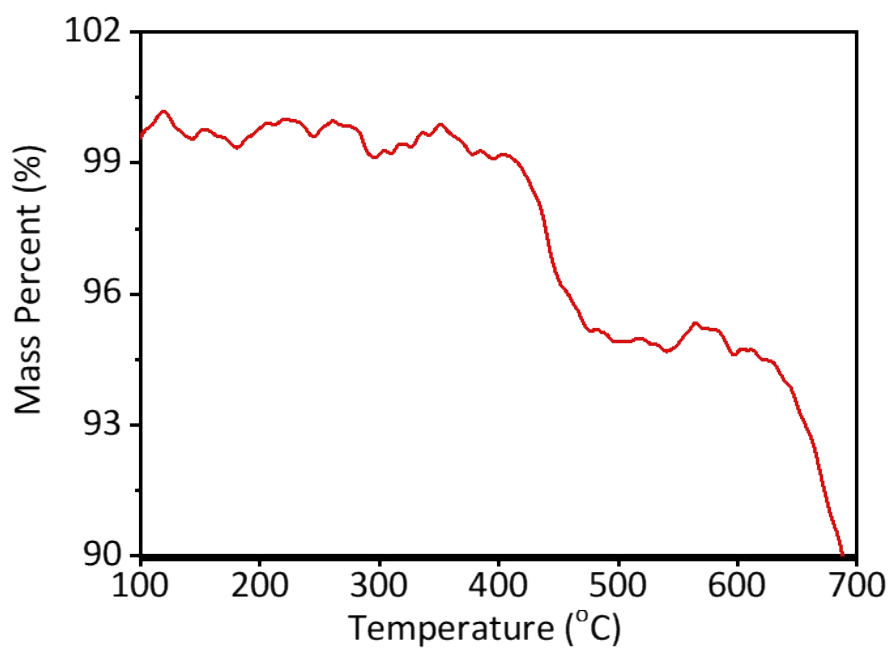

**Figure S3-4.** The TGA data of antimonene nanosheets.

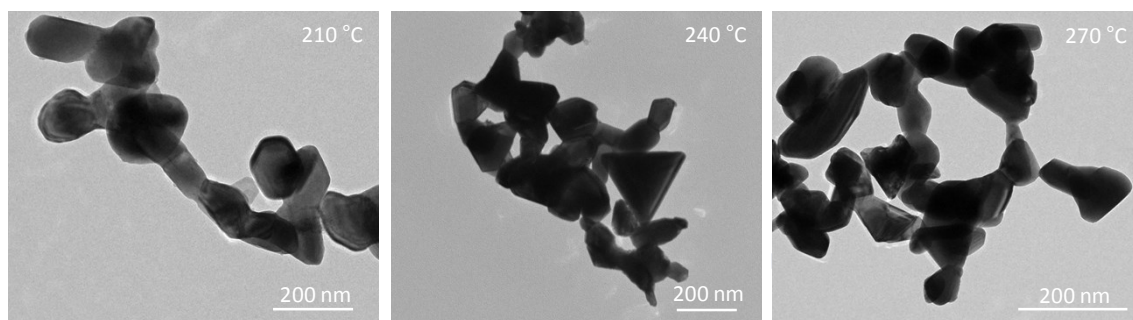

**Figure S4-1.** The TEM images of the sample extracted from the reaction of Sb-TOPO + OLA at 210 °C, 240 °C, and 270 °C. We consider that the precursor reactivity may change by using TOPO replaced of PA, thus the reaction was performed at a wide temperature range from 210 °C to 270 °C. Under all temperature conditions, irregular morphology was formed.

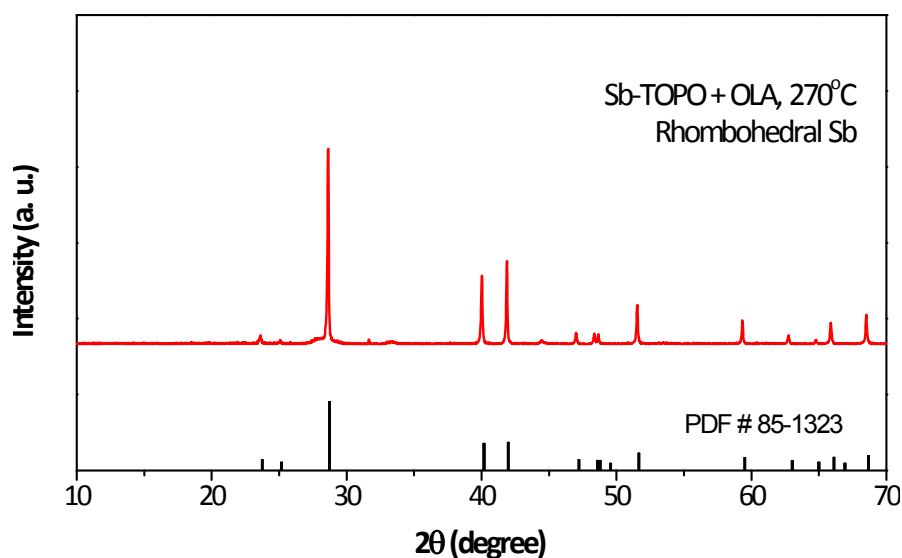

**Figure S4-2.** XRD pattern of the synthesized Sb nanocrystals from the reaction of Sb-TOPO + OLA at 270 °C. The obtained Sb nanocrystals shows a rhombohedral structure without the formation of  $\text{Sb}_2\text{O}_3$ .

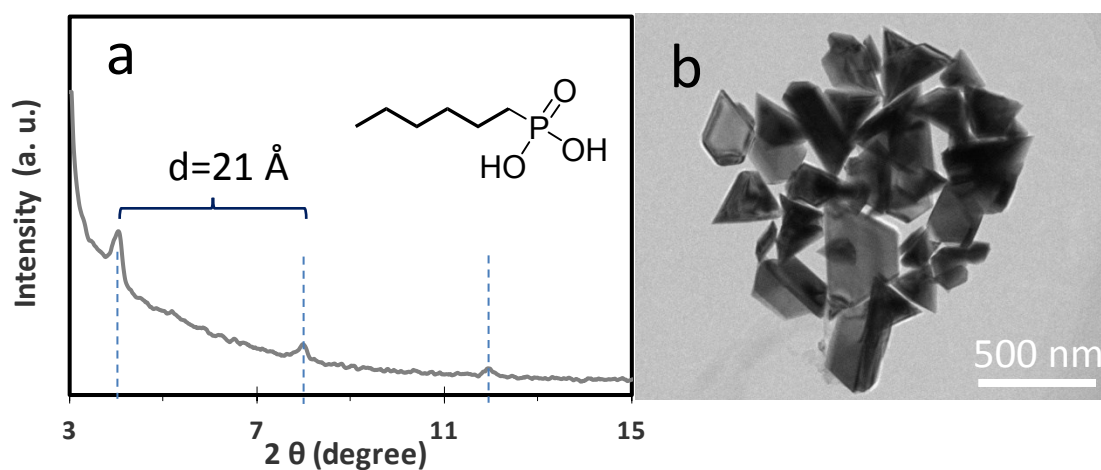

**Figure S5-1.** (a) The small angle XRD pattern of the Sb-HPA precursor and (b) the corresponding TEM image of antimonene nanosheets synthesized with Sb-HPA.

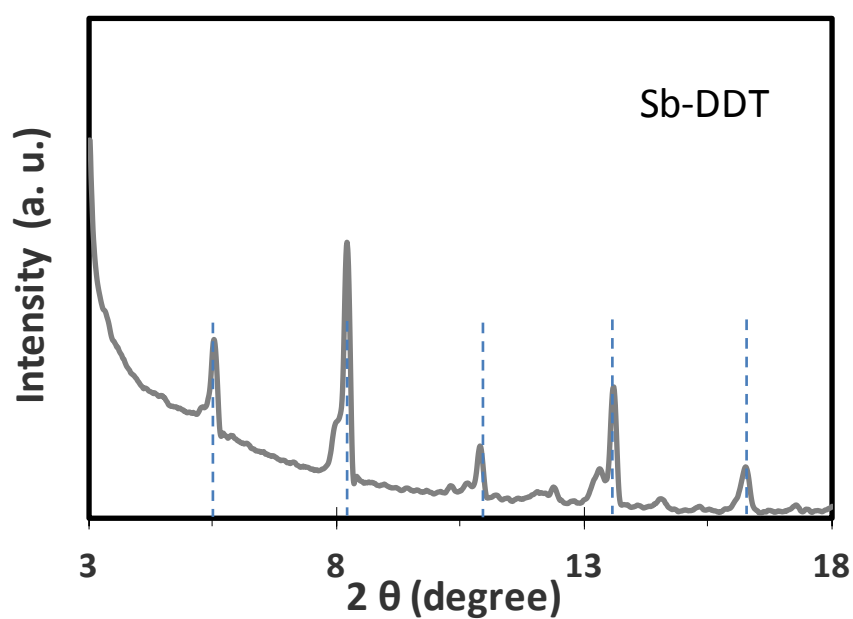

**Figure S5-2.** The small angle XRD pattern of the Sb-DDT precursor. The obviously uniformly-spaced diffraction peaks confirmed the formation of lamellar structure in Sb-DDT precursor. In order to get a solid powder for the XRD measurement,  $\text{Sb}(\text{OAc})_3$  was used instead of  $\text{SbCl}_3$  for preparation of Sb-DDT precursor.

|         | Diffraction Peak<br>(2 $\theta$ ) | Average peak<br>separation (2 $\theta$ ) | Interlayer<br>spacing (Å) | Ligand<br>length (Å) |
|---------|-----------------------------------|------------------------------------------|---------------------------|----------------------|
| Sb-HPA  | 4.04/7.98/12.44                   | 4.2                                      | 21.0                      | 10.1                 |
| Sb-HDPA | 4.2/6.34/8.48/10.6                | 2.13                                     | 41.4                      | 21.8                 |
| Sb-TOPO | \                                 | \                                        | \                         | \                    |
| Sb-DDT  | 5.54/8.22/10.3/13.6/16.26         | 2.68                                     | 33.1                      | 16.7                 |

**Table S1.** Calculation of the interlayer spacing in the lamellar structure and the length of surface ligand molecule chains.

The interlayer spacing was calculated by  $d = \lambda / 2 \sin \theta$ , where  $\lambda = 1.54 \text{ Å}$ ,  $\theta$  is diffraction angle. The surface ligand length was calculated by an empirical formula,  $L \text{ (nm)} = 0.15 + 0.127n$ , where  $n$  is the number of carbon atoms in the alkyl chain.<sup>3</sup>

(3) Evans, D. F.; Wennerström, H. *The Colloidal Domain: Where Physics, Chemistry and Biology Meet*; Wiley-VCH: Weinheim, 1999.

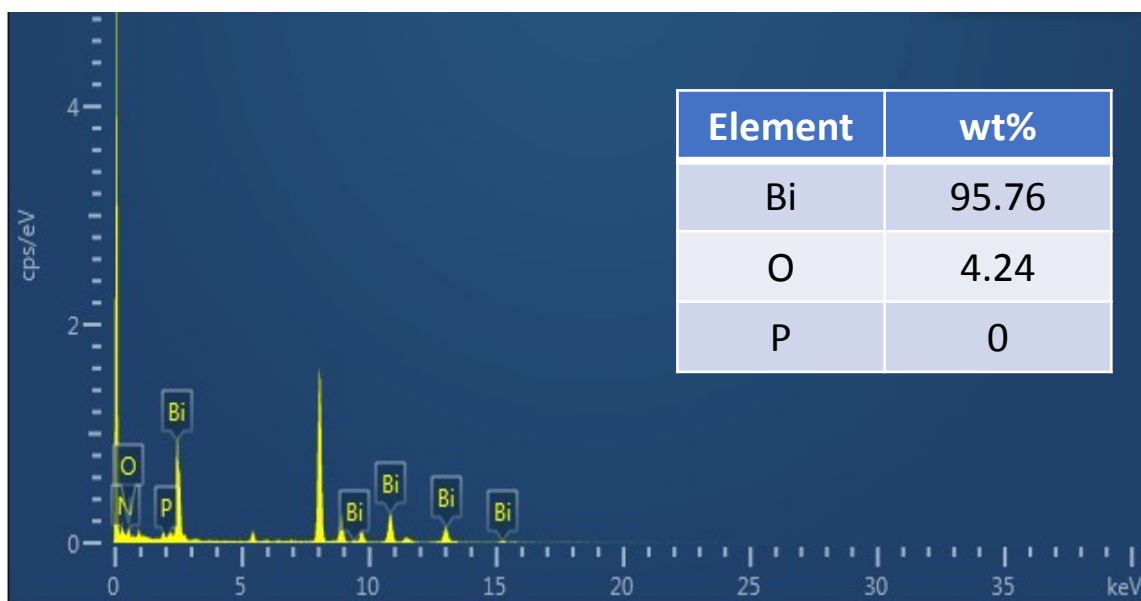

**Figure S6-1.** EDS spectrum of the bismuthene nanosheets. Here, the 0 wt% of P atom is thanks to the very trace amount of P atom which is below the detection limit of the machine.

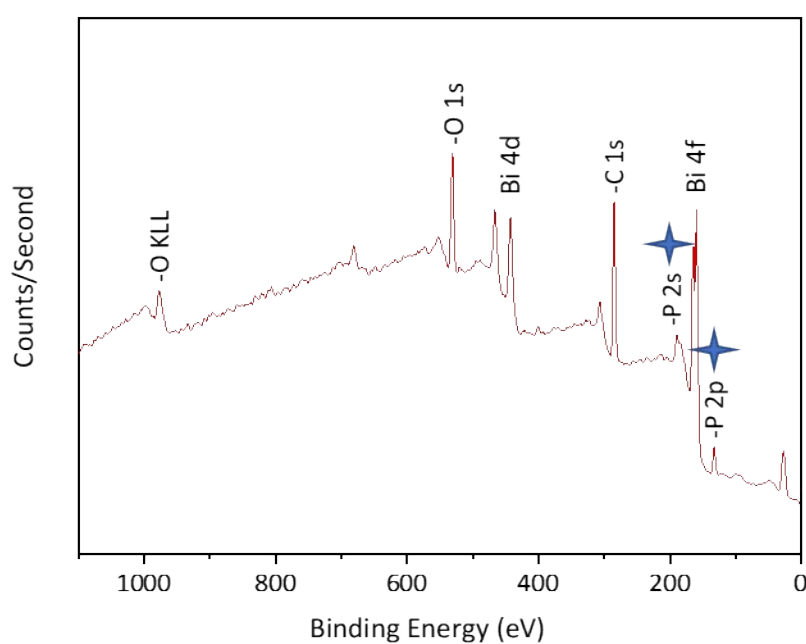

**Figure S6-2.** Wide-scan X-ray photoelectron spectra of the obtained bismuthene nanosheets.

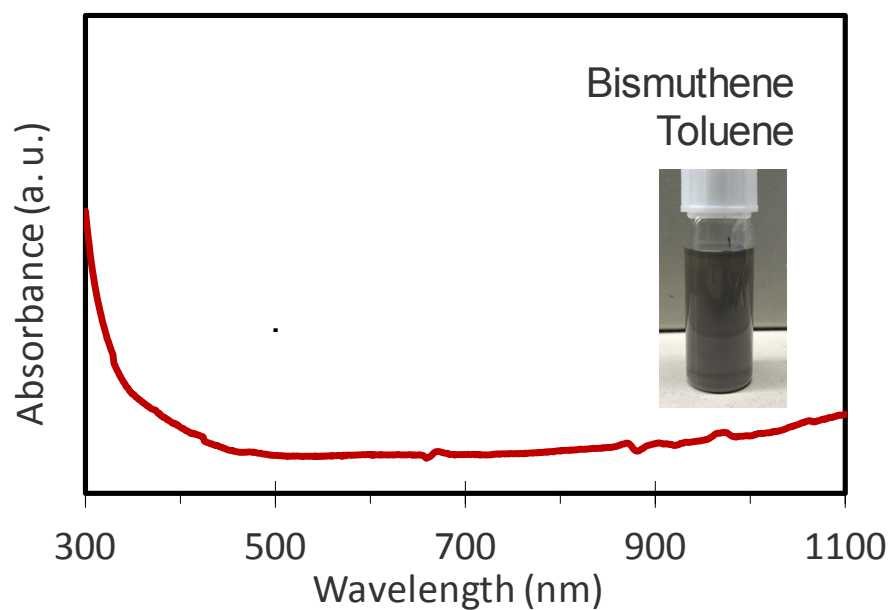

**Figure S6-3.** The absorption spectrum of the as-synthesized bismuthene nanosheets, the photograph of bismuthene solution dispersed in toluene is shown in the insert.

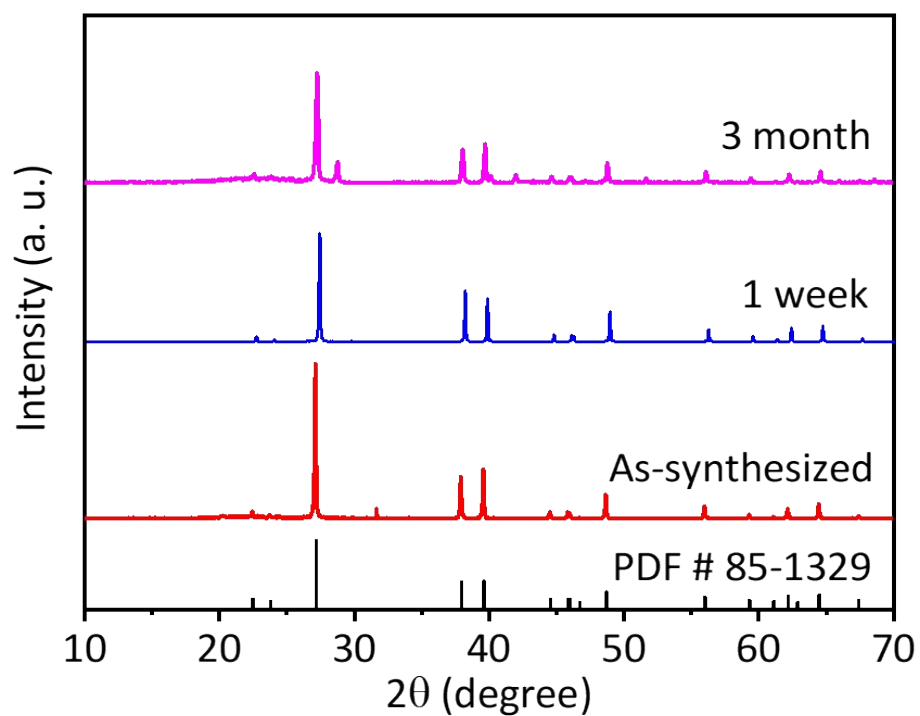

**Figure S6-4.** The XRD patterns of the as-synthesized bismuthene nanosheets and after storage in the air.
